# Supplementary material for: Tumor extracellular vesicles mediate anti-PD-L1 therapy resistance by decoying anti-PD-L1
Source: PubMed Central journal article supplement (PMC9622748; doi:10.1038/s41423-022-00926-6), 2022-10-11
Supplement: 41423_2022_926_MOESM1_ESM.pdf [file 41423_2022_926_MOESM1_ESM.pdf]

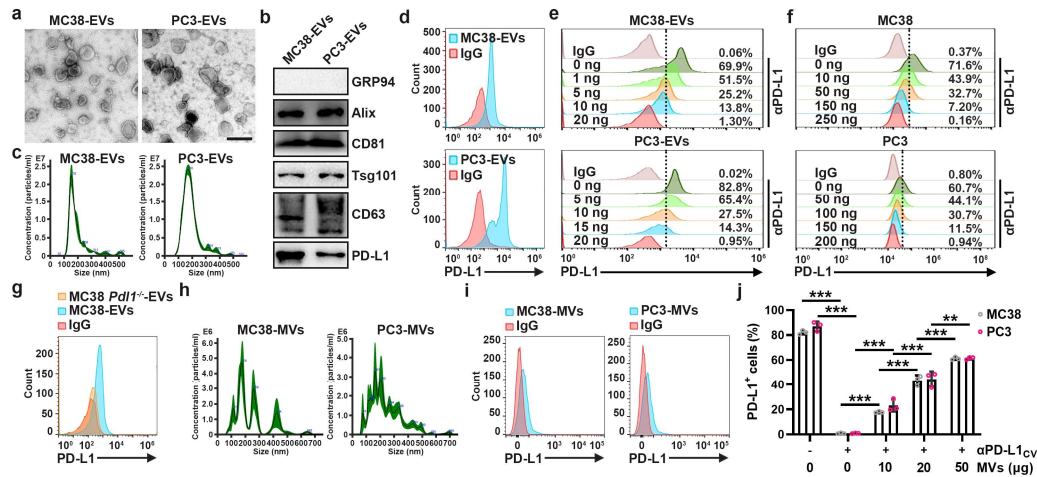

**Supplementary Fig. 1** TEV PD-L1 competes with PD-L1 on tumor cells to bind  $\alpha$ PD-L1. **a**, The morphology of EVs was detected by electron microscopy (EM). Scale bar, 100 nm. **b**, The indicated proteins in EVs were detected by western blotting. **c**, The size distribution of EVs was analyzed by nanoparticle tracking analysis. **d**, PD-L1 on MC38-EVs and PC3-EVs was detected by flow cytometry. **e, f**, One microgram of MC38-EVs and PC3-EVs (**e**) or  $1 \times 10^5$  MC38 and PC3 cells (**f**) were coincubated with the indicated doses of  $\alpha$ PD-L1 in 100  $\mu$ l of medium for 30 min. Then, PD-L1 on EVs (**e**) or cells (**f**) was detected by flow cytometry, and representative histograms are shown. The  $\alpha$ PD-L1 for coincubation and detection recognizes the same epitope in PD-L1. **g**, PD-L1 on MC38 *Pdl1*<sup>-/-</sup>-EVs was detected by flow cytometry. **h**, The size distribution of MC38-MVs and PC3-MVs was analyzed by nanoparticle tracking analysis. **i**, PD-L1 on MC38-MVs and PC3-MVs was detected by flow cytometry. **j**, A total of  $1 \times 10^5$  MC38 and PC3 cells were coincubated with  $\alpha$ PD-L1<sub>CV</sub> with or without 50  $\mu$ g of MC38-MVs or PC3-MVs in 100  $\mu$ l of medium for 30 min. Then, PD-L1 on the cells was detected by flow cytometry. Representative results from three independent experiments are shown ( $n = 3$ ). \*\* $P < 0.01$ ; \*\*\* $P < 0.001$  (unpaired two-tailed Student's *t*-test; mean and s.d.).

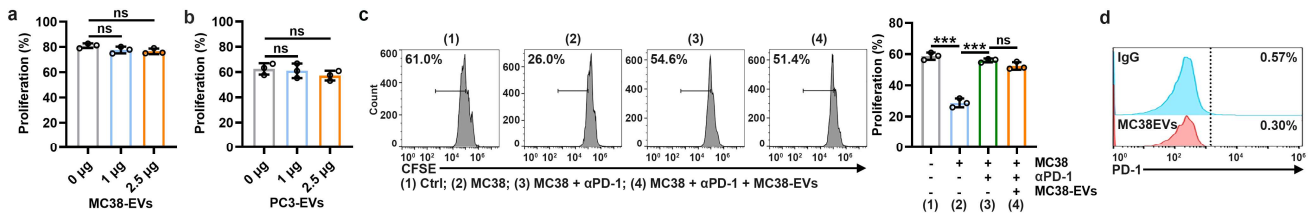

**Supplementary Fig. 2** TEVs impair  $\alpha$ PD-L1-induced CD8<sup>+</sup> T-cell proliferation by consuming  $\alpha$ PD-L1.

**a, b**, CFSE-labeled CD8<sup>+</sup> T cells were stimulated with 2  $\mu\text{g ml}^{-1}$  anti-CD3 and anti-CD28 for 24 h and then treated with the indicated doses of MC38-EVs (a) or PC3-EVs (b) in 200  $\mu\text{l}$  of medium for 48 h. Then, the proliferation of CD8<sup>+</sup> T cells was assessed according to CFSE dilution by flow cytometry. **c**, CFSE-labeled CD8<sup>+</sup> T cells were stimulated with 2  $\mu\text{g ml}^{-1}$  anti-CD3 and anti-CD28 for 24 h and then coincubated with  $5 \times 10^4$  MC38 and  $\alpha$ PD-1 with or without 2.5  $\mu\text{g}$  of MC38-EVs in 200  $\mu\text{l}$  of medium for 48 h. Then, the CFSE dilution was measured by flow cytometry. **d**, PD-1 on MC38-EVs was detected by flow cytometry. Representative results from three independent experiments are shown ( $n = 3$ ). \*\*\* $P < 0.001$ ; ns, not significant (one-way ANOVA followed by Tukey's test; mean and s.d.).

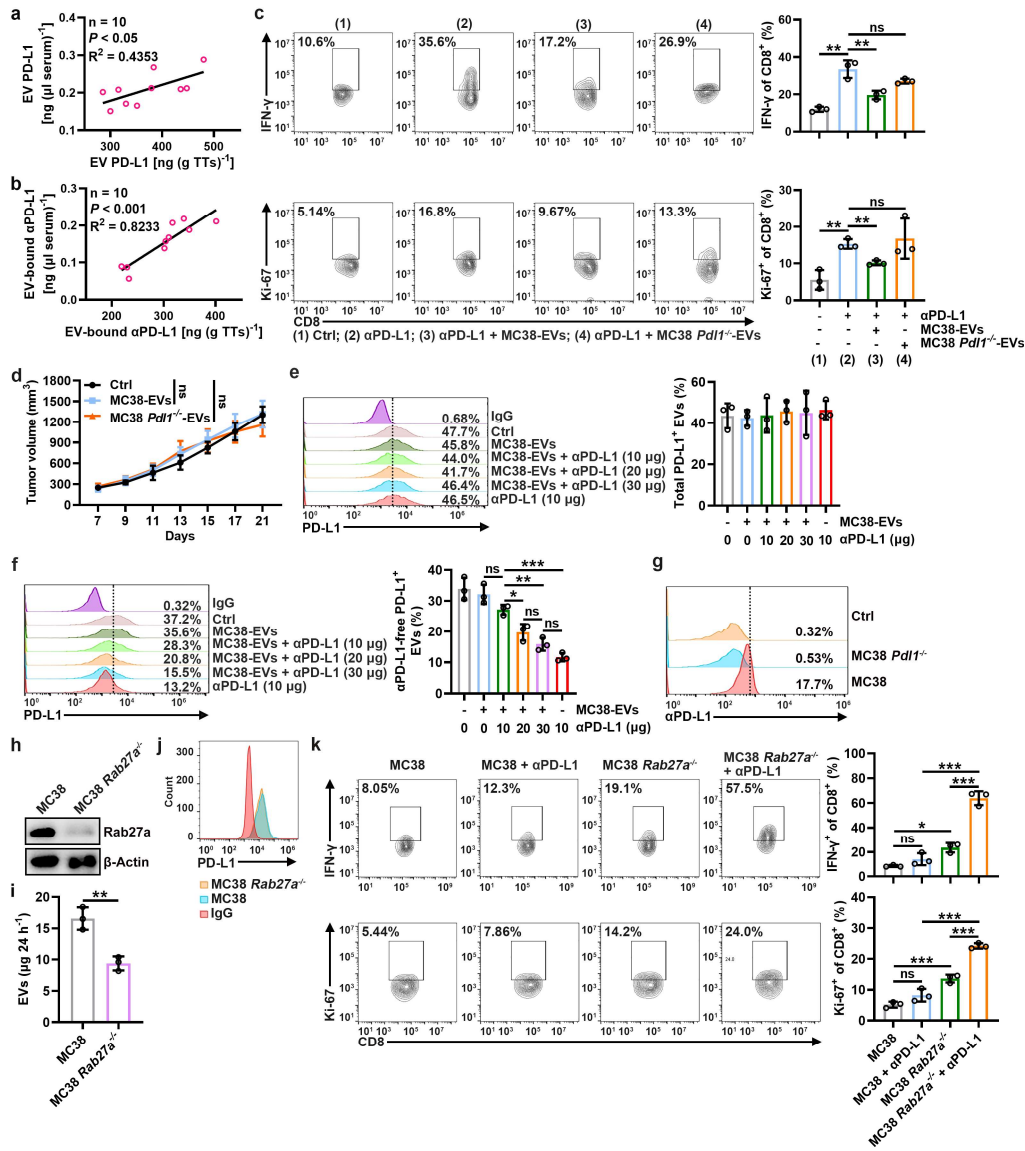

**Supplementary Fig. 3** TEV-mediated αPD-L1 consumption blunts the antitumor effect of αPD-L1. **a, b**, PD-L1 levels on Circ-EVs and EVs-TT or αPD-L1 amount bound by Circ-EVs and EVs-TT were detected by ELISA. The correlation of PD-L1 levels on Circ-EVs and EVs-TT (**a**) and the amounts of αPD-L1 bound by Circ-EVs and EVs-TT (**b**) were analyzed. **c**, IFN-γ<sup>+</sup>CD8<sup>+</sup> and Ki-67<sup>+</sup>CD8<sup>+</sup> T cells in TTs of mice in Fig. 3c were analyzed by flow cytometry. **d**, Mice with MC38 tumors were intravenously injected with 20 µg of MC38-EVs or MC38 *Pd11*<sup>-/-</sup>-EVs every 2 days starting when the tumor size reached 100-200 mm<sup>3</sup>. Tumor sizes were monitored every other day. **e-g**, Total PD-L1 was detected by αPD-L1 recognizing distinct epitope in PD-L1 to therapeutic αPD-L1 (**e**), αPD-L1-free PD-L1 was detected by

$\alpha$ PD-L1 recognizing the same epitope in PD-L1 to therapeutic  $\alpha$ PD-L1 (**f**) or  $\alpha$ PD-L1 (**g**) on EVs from TTs of mice in Fig. 3d (**e**, **f**) or mice with MC38 tumors or MC38 *Pd11*<sup>-/-</sup> tumors (**g**) were analyzed by flow cytometry. **h-j**, Rab27a in (**h**), EV release from (**i**) or PD-L1 on (**j**)  $1 \times 10^7$  MC38 and MC38 *Rab27a*<sup>-/-</sup> cells was detected by western blotting (**h**), quantified by BCA assay (**i**) or analyzed by flow cytometry (**j**). **k**, IFN- $\gamma$ <sup>+</sup>CD8<sup>+</sup> and Ki-67<sup>+</sup>CD8<sup>+</sup> T cells in the TTs of mice in Fig. 3h were analyzed by flow cytometry. Representative results from two independent experiments are shown ( $n = 3$  in **c**, **e**, **f**, **i**, **k**;  $n = 5$  in **d**). \* $P < 0.05$ ; \*\* $P < 0.01$ ; \*\*\* $P < 0.001$ ; ns, not significant (Spearman rank-order correlation test in **a**, **b**; one-way ANOVA followed by Tukey's test in **c**, **d**, **f**, **k**; unpaired two-tailed Student's *t*-test in **i**; mean and s.d.).

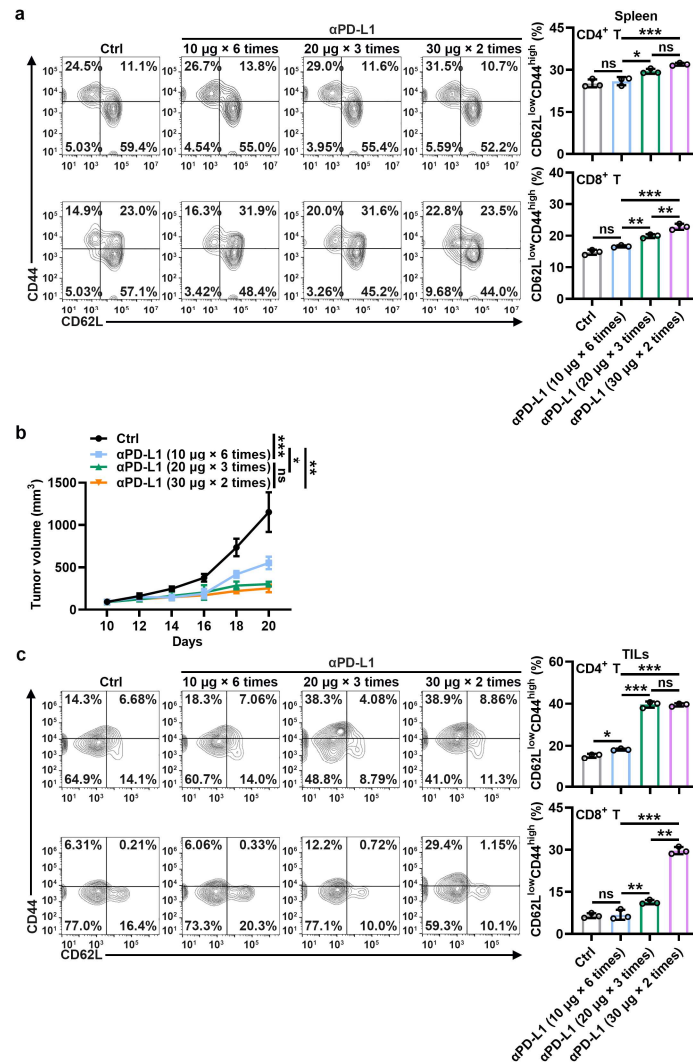

**Supplementary Fig. 4** High-dose and low-frequency treatment reverses  $\alpha\text{PD-L1}$  therapy resistance. **a-c**, Mice with TRAMP-C2 (**a**) or MC38 (**b, c**) tumors were intravenously injected with  $\alpha\text{PD-L1}$  according to the indicated strategies every 2 days starting when the tumor size reached 100-200  $\text{mm}^3$ .  $\text{CD62L}^{\text{low}}\text{CD44}^{\text{high}}$  memory T cells in the spleen (**a**) and TILs (**c**) were analyzed by flow cytometry on Days 19 (**a**) and 20 (**c**). Tumor sizes were monitored every other day (**b**). Representative results from two independent experiments are shown ( $n = 3$  in **a, c**;  $n = 5$  in **b**). \* $P < 0.05$ ; \*\* $P < 0.01$ ; \*\*\* $P < 0.001$ ; ns, not significant (one-way ANOVA followed by Tukey's test; mean and s.d.).

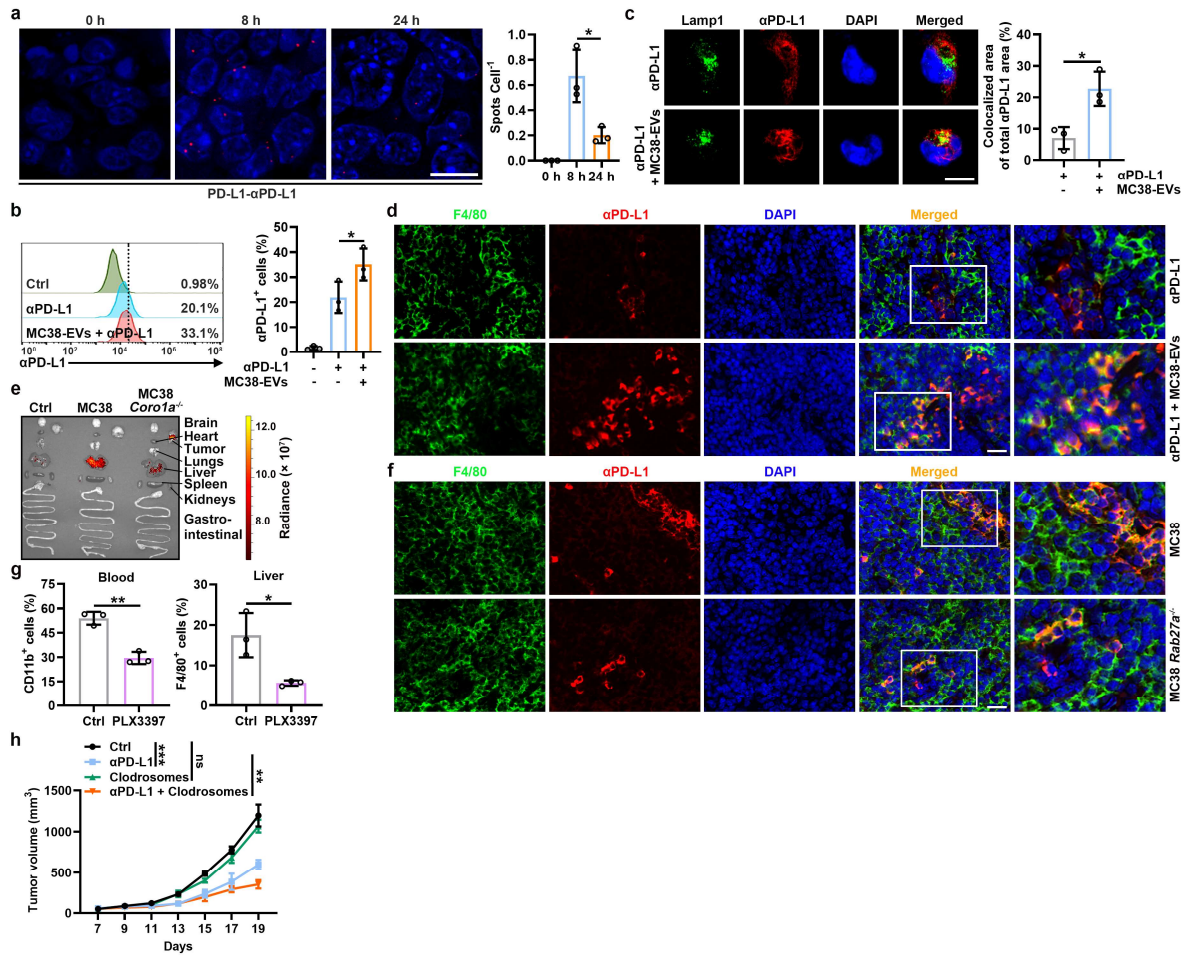

**Supplementary Fig. 5** TEV-bound  $\alpha$ PD-L1 is eliminated by macrophages. **a, b**, Mice with MC38 tumors were intravenously injected with 10  $\mu$ g of  $\alpha$ PD-L1 for the indicated time. Then, the interaction of  $\alpha$ PD-L1 and tumor PD-L1 was detected by PLA. Scale bar, 10  $\mu$ m. **b, c**, PMs were treated with 2  $\mu$ g of  $\alpha$ PD-L1 without or with 5  $\mu$ g of MC38-EVs for 2 h. The phagocytosis of  $\alpha$ PD-L1 was detected by flow cytometry (**b**), and the colocalization of  $\alpha$ PD-L1 and lysosomes was detected by immunofluorescence. Scale bar, 10  $\mu$ m (**c**). **d-f**, Mice without tumors (**d**), with MC38 or MC38 *Coro1a*<sup>-/-</sup> tumors (**e**), or with MC38 or MC38 *Rab27a*<sup>-/-</sup> tumors (**f**) were intravenously injected with 10  $\mu$ g of Alexa Fluor 680-labeled  $\alpha$ PD-L1 with (**d**) or without (**e, f**) 20  $\mu$ g of MC38-EVs. The  $\alpha$ PD-L1 in spleen macrophages was detected by immunofluorescence (scale bar, 20  $\mu$ m) at 24 h (**d**) or 21 days after tumor cell injection (**f**). The distribution of  $\alpha$ PD-L1 was detected by IVIS after 24 h (**e**). **g**, Mice were intraperitoneally injected with 20  $\mu$ g of PLX3397 3 times at 2 day intervals, and monocytes in the blood and macrophages in the liver

were analyzed by flow cytometry 24 h after the last injection. **h**, Mice with MC38 tumors were intravenously injected with 10  $\mu\text{g}$  of  $\alpha\text{PD-L1}$  with or without intraperitoneal injection of 50  $\mu\text{l}$  of Clodrosomes every 2 days starting when the tumor size reached 100-200  $\text{mm}^3$ . Tumor sizes were monitored every other day. Representative results from two independent experiments are shown ( $n = 3$  except for  $n = 5$  in **h**).  $*P < 0.05$ ;  $**P < 0.01$ ;  $***P < 0.001$  (unpaired two-tailed Student's *t*-test; mean and s.d.).

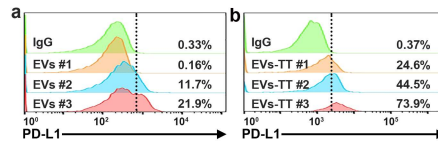

**Supplementary Fig. 6** PD-L1 is presented on EVs from the sera and TTs of tumor patients. **a, b**, PD-L1 on EVs from sera (**a**) and TTs (**b**) from lung cancer patients was detected by flow cytometry. Representative results from three independent experiments are shown.



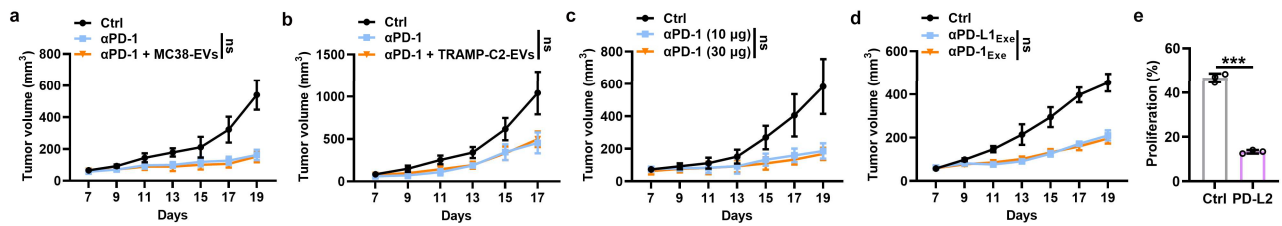

**Supplementary Fig. 7** TEV PD-L1 causes different therapeutic outcomes for αPD-L1 and αPD-1. **a-c**, Mice with MC38 (**a**) or TRAMP-C2 (**b, c**) tumors were intravenously injected with 10 μg of αPD-1 (**a, b**) or the indicated doses of αPD-1 (**c**) with 20 μg of MC38-EVs (**a**) or TRAMP-C2-EVs (**b**) or without EVs (**c**) every 2 days starting when the tumor size reached 80-100 mm<sup>3</sup>. The tumor size was monitored every other day. **d**, Mice with TRAMP-C2 *Rab27a*<sup>-/-</sup> tumors were intravenously injected with 30 μg αPD-1 or αPD-L1 every 2 days starting when the tumor size reached 80-100 mm<sup>3</sup>. The tumor size was monitored every other day. **e**, PD-1<sup>+</sup> Treg cells were sorted from *Foxp3*<sup>GFP</sup> mice and labelled with CellTrace Far Red followed by stimulated with 1 ng ml<sup>-1</sup> PMA, 200 ng ml<sup>-1</sup> ionomycin, and 4000 U ml<sup>-1</sup> murine IL-2 in the presence of 5 μg ml<sup>-1</sup> recombinant mouse PD-L2 for 72 h. Then, cell proliferation was determined by flow cytometry. Representative results from three independent experiments are shown (*n* = 5). \*\*\**P* < 0.001; ns, not significant (unpaired two-tailed Student's *t*-test; mean and s.d.).

**Supplementary Table 1: Information of antibodies used in this article**

| <b>Antibodies (dilution)</b>                           | <b>Resource</b> | <b>Identifier</b> |
|--------------------------------------------------------|-----------------|-------------------|
| anti-mouse CD9 PE (1:500)                              | BioLegend       | Cat: 124806       |
| anti-mouse CD9 APC (1:500)                             | BioLegend       | Cat: 124812       |
| anti-human CD9 PE (1:500)                              | BioLegend       | Cat: 312105       |
| anti-human CD63 APC (1:500)                            | BioLegend       | Cat: 353007       |
| anti-mouse CD81 APC (1:500)                            | BioLegend       | Cat: 104909       |
| anti-human CD81 APC (1:500)                            | BioLegend       | Cat: 349510       |
| anti-mouse CD274 PE (1:500)                            | BioLegend       | Cat: 124308       |
| anti-mouse CD274 PE (1:500)                            | BioLegend       | Cat: 153612       |
| anti-human CD274 PE (1:500)                            | BioLegend       | Cat: 329706       |
| anti-human CD274 APC (1:500)                           | BioLegend       | Cat: 329708       |
| anti-mouse CD3e (2 µg ml <sup>-1</sup> )               | Bio X Cell      | Cat: BE0001-1     |
| anti-mouse CD28 (2 µg ml <sup>-1</sup> )               | Bio X Cell      | Cat: BE0015-5     |
| Mouse IgG1, κ Isotype Antibody APC (1:500)             | BioLegend       | Cat: 400121       |
| Rat IgG2b, κ Isotype Antibody PE (1:500)               | BioLegend       | Cat: 400607,      |
| Rat IgG2a, κ Isotype Antibody PE (1:500)               | BioLegend       | Cat: 400507       |
| Purified anti-mouse CD274 Antibody (1:500)             | BioLegend       | Cat: 124302       |
| Purified anti-mouse CD279 Antibody (1:500)             | BioLegend       | Cat: 135202       |
| Purified anti-human CD274 Antibody (1:500)             | BioLegend       | Cat: 329702       |
| Purified anti-rat IgG2a Antibody (1:500)               | BioLegend       | Cat: 407502       |
| Biotin anti-rat IgG Antibody (1:500)                   | BioLegend       | Cat: 405428       |
| eBioscience™ CD274 Monoclonal Antibody, Biotin (1:500) | Invitrogen      | Cat: 13-5982-82   |
| eBioscience™ Fixable Viability Dye eFluor™ 520 (1:500) | Invitrogen      | Cat: 65-0867-14   |
| anti-mouse CD45 PB (1:500)                             | BioLegend       | Cat: 103126       |
| anti-mouse CD44 APC (1:500)                            | BioLegend       | Cat: 103012       |
| anti-mouse CD4 APC/Cyanine7 (1:500)                    | BioLegend       | Cat: 100526       |
| anti-mouse CD8α APC/Cyanine7 (1:500)                   | BioLegend       | Cat: 100714       |
| anti-mouse CD8α APC (1:500)                            | BioLegend       | Cat: 100712       |
| anti-mouse PD-1 PE (1:500)                             | BioLegend       | Cat: 135205       |
| anti-mouse CD62L PE (1:500)                            | BioLegend       | Cat: 161204       |
| anti-mouse IFN-γ PE (1:500)                            | BioLegend       | Cat: 505808       |
| anti-mouse Ki-67 PE (1:500)                            | BioLegend       | Cat: 151209       |
| anti-mouse/human Ki-67 PerCP/Cyanine5.5 (1:500)        | BioLegend       | Cat: 151221       |
| anti-mouse FOXP3 APC (1:500)                           | Invitrogen      | Cat: 17-5773-82   |
| Mouse anti-CD63 (IF) (1:200)                           | Invitrogen      | Cat: MA1-19281    |
| Rabbit anti-CD63 (WB) (1:1000)                         | ABclonal        | Cat: A5271        |
| Rabbit anti-LAMP1 (IF) (1:200)                         | Abcam           | Cat: ab208943     |
| Rabbit anti-GRP94 (1:1000)                             | ABclonal        | Cat: A0989        |
| Rabbit anti-Tsg101 (1:1000)                            | ABclonal        | Cat: A1692        |
| Rabbit anti-Alix (1:1000)                              | Proteintech     | Cat: 12422-1-AP   |
| Rabbit anti-PD-L1 (IF) (1:200)                         | Proteintech     | Cat: 28076-1-AP   |
| Rabbit anti-PD-L1 (WB) (1:1000)                        | ABclonal        | Cat: A1645        |

|                                                       |               |                 |
|-------------------------------------------------------|---------------|-----------------|
| Rabbit anti-Rab27a (1:1000)                           | ABclonal      | Cat: A1934      |
| Rabbit anti- $\beta$ -Actin (1:1000)                  | ABclonal      | Cat: AC026      |
| Goat anti-mouse IgG HRP (1:200)                       | MultiSciences | Cat: 70-GAM007  |
| Goat anti-rabbit IgG HRP (1:200)                      | MultiSciences | Cat: 70-GAR007  |
| Mouse Control IgG (1:500)                             | ABclonal      | Cat: AC011      |
| Rabbit Control IgG (1:500)                            | ABclonal      | Cat: AC005      |
| Purified anti-mouse CD63 Antibody (1:500)             | BioLegend     | Cat: 143901     |
| Ultra-LEAF™ Purified anti-human CD63 Antibody (1:500) | BioLegend     | Cat: 353039     |
| Biotin anti-mouse CD9 Antibody (1:200)                | BioLegend     | Cat: 124803     |
| Biotin anti-mouse CD81 Antibody (1:200)               | BioLegend     | Cat: 104903     |
| Biotin anti-mouse F4/80 Antibody (1:200)              | BioLegend     | Cat: 123105     |
| Goat anti-rabbit IgG DyLight 488 (1:200)              | MultiSciences | Cat: 70-GAR4882 |
| Goat anti-mouse IgG DyLight 488 (1:200)               | MultiSciences | Cat: 70-GAM4882 |
| Goat anti-mouse IgG DyLight 594 (1:200)               | MultiSciences | Cat: 70-GAM5942 |
| Goat anti-rabbit IgG DyLight 594 (1:200)              | MultiSciences | Cat: 70-GAR5942 |

**Abbreviations:** IF, immunofluorescence; WB, western blotting.

### Supplementary Table 2: Information of gRNA sequences used in this article.

| Name                       | Sequence (5' to 3')    |
|----------------------------|------------------------|
| <i>Mouse Rab27a</i> gRNA-1 | AACCCAGATATAGTGCTGTG   |
| <i>Mouse Rab27a</i> gRNA-2 | CCTGAAATCAATGCCCACTG   |
| <i>Mouse Pdl1</i> gRNA-1   | GCCTGCTGTCACTTGCTACG   |
| <i>Mouse Pdl1</i> gRNA-2   | CTTGACGTCTGTGATCTGAA   |
| <i>Mouse Coro1a</i> gRNA-1 | ACCAGGCGATGTCTAGCACAGG |
| <i>Mouse Coro1a</i> gRNA-2 | GTAGACAAGAACGTGCCCTGG  |
